# Supplementary material
Source: PubMed Central journal article supplement (PMC5554622)
Supplement: NIHMS884950-supplement-data_and_figures.pdf [file NIHMS884950-supplement-data_and_figures.pdf]

Supplementary Information:  
Lack of evidence for conserved secondary structure in long  
noncoding RNAs

Elena Rivas<sup>1</sup>, Jody Clements<sup>2</sup>, and Sean R. Eddy<sup>1,3,4,5</sup>

<sup>1</sup>Department of Molecular and Cellular Biology, Harvard University, Cambridge, Massachusetts, USA

<sup>2</sup>Janelia Research Campus, Howard Hughes Medical Institute, Ashburn, Virginia, USA

<sup>3</sup>Howard Hughes Medical Institute, Harvard University, Cambridge, Massachusetts, USA

<sup>4</sup>FAS Center for Systems Biology, Harvard University, Cambridge, Massachusetts, USA

<sup>5</sup>John A. Paulson School of Engineering and Applied Sciences, Harvard University, Cambridge, Massachusetts, USA

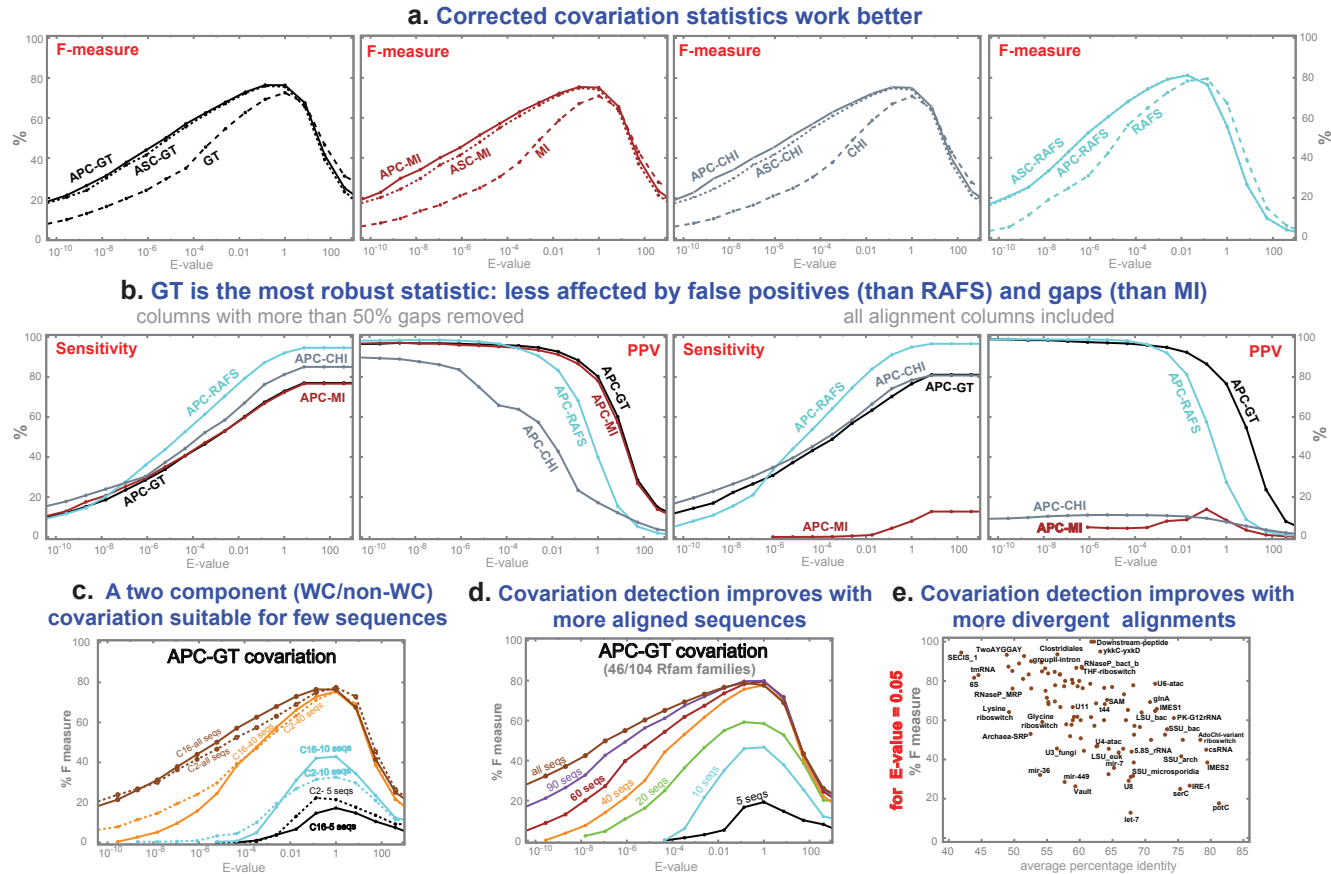

**Supplementary Figure 1. Characterization of different covariation statistics on a positive testset of 104 RNAs.** (a) Plots of the F measure – the harmonic mean of sensitivity (SEN) and positive predictive value (PPV),  $F = 2 \frac{SEN \times PPV}{SEN + PPV}$  – for four different covariation statistics as a function of the score’s E-value, over all alignments, using R-scape with default parameters. (b) Effect of alignment gaps on the different covariation statistics, seen by including all alignment columns (right) as compared to the R-scape default (left). (c) Effect of measuring covariation using a *binary* classification (whether a pair is canonical Watson-Crick/G:U or not) versus using the full *sixteen-way* classification. (d) Covariation detection as a function of the number of sequences in the alignments. (e) The F measure for each of the 104 RNA Rfam alignments in the positive testset as a function of average percentage identity, at an E-value threshold of 0.05.

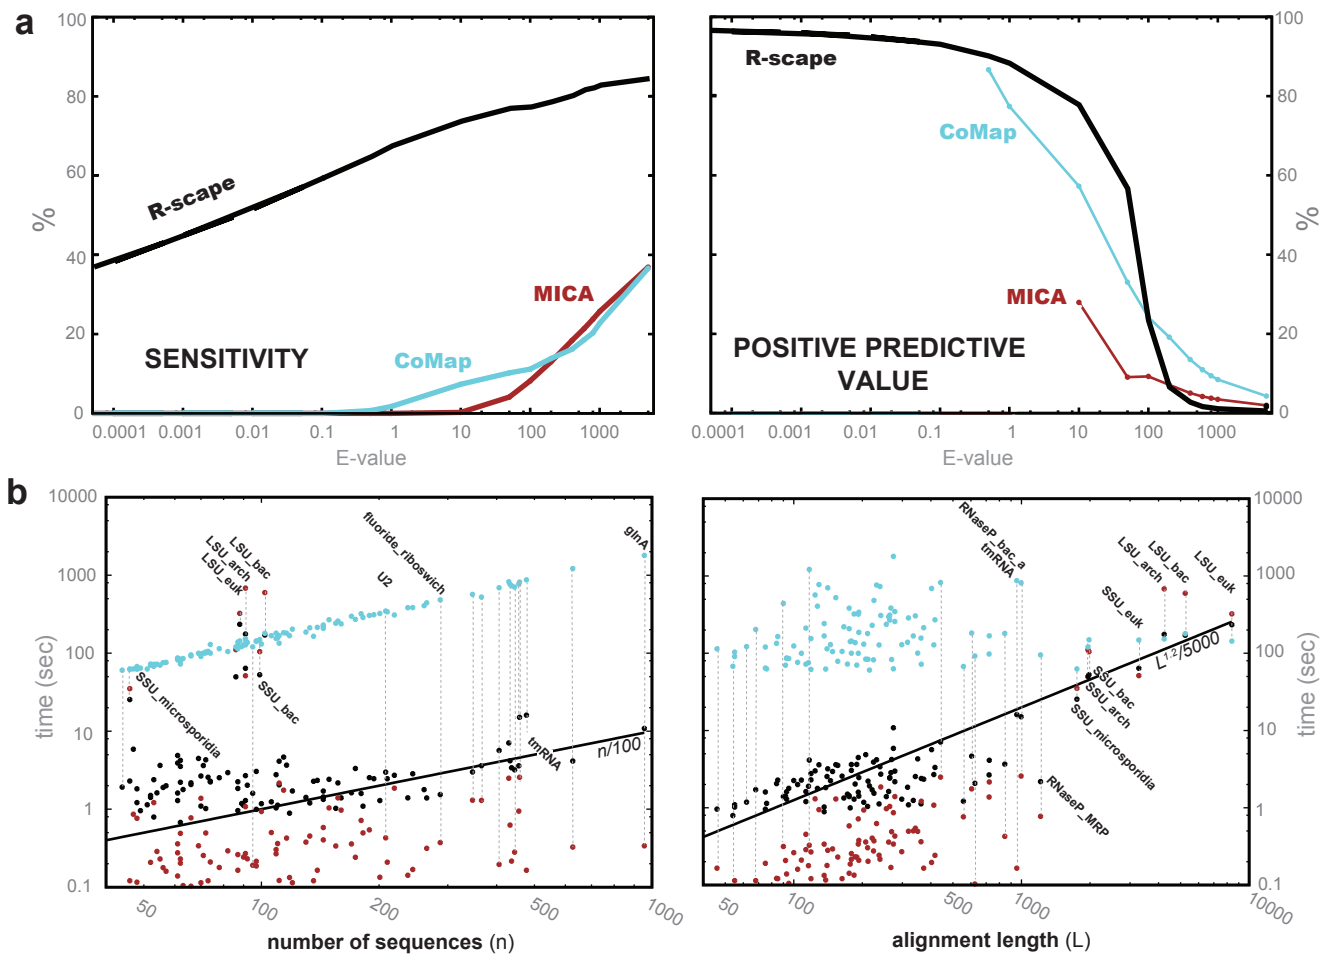

**Supplementary Figure 2. Comparison to related methods CoMap and MICA [12] on the testset of 104 RNAs.** (a) Sensitivity (percentage of significant base pairs) and positive predictive value (percentage of significant pairs that are base pairs) as a function of the score's E-value. (b) Running times for the three methods (R-scape in black, CoMap cyan, MICA red) on a log-log plot as a function of the number of sequences in the alignment (left) and as a function of the alignment length (right). Running times are for a single 3GHz intel Core i7 with 8GB 1600GHz DDR3 RAM. Running times for R-scape and CoMap include the cost of generating a phylogenetic tree using FastTree [26].

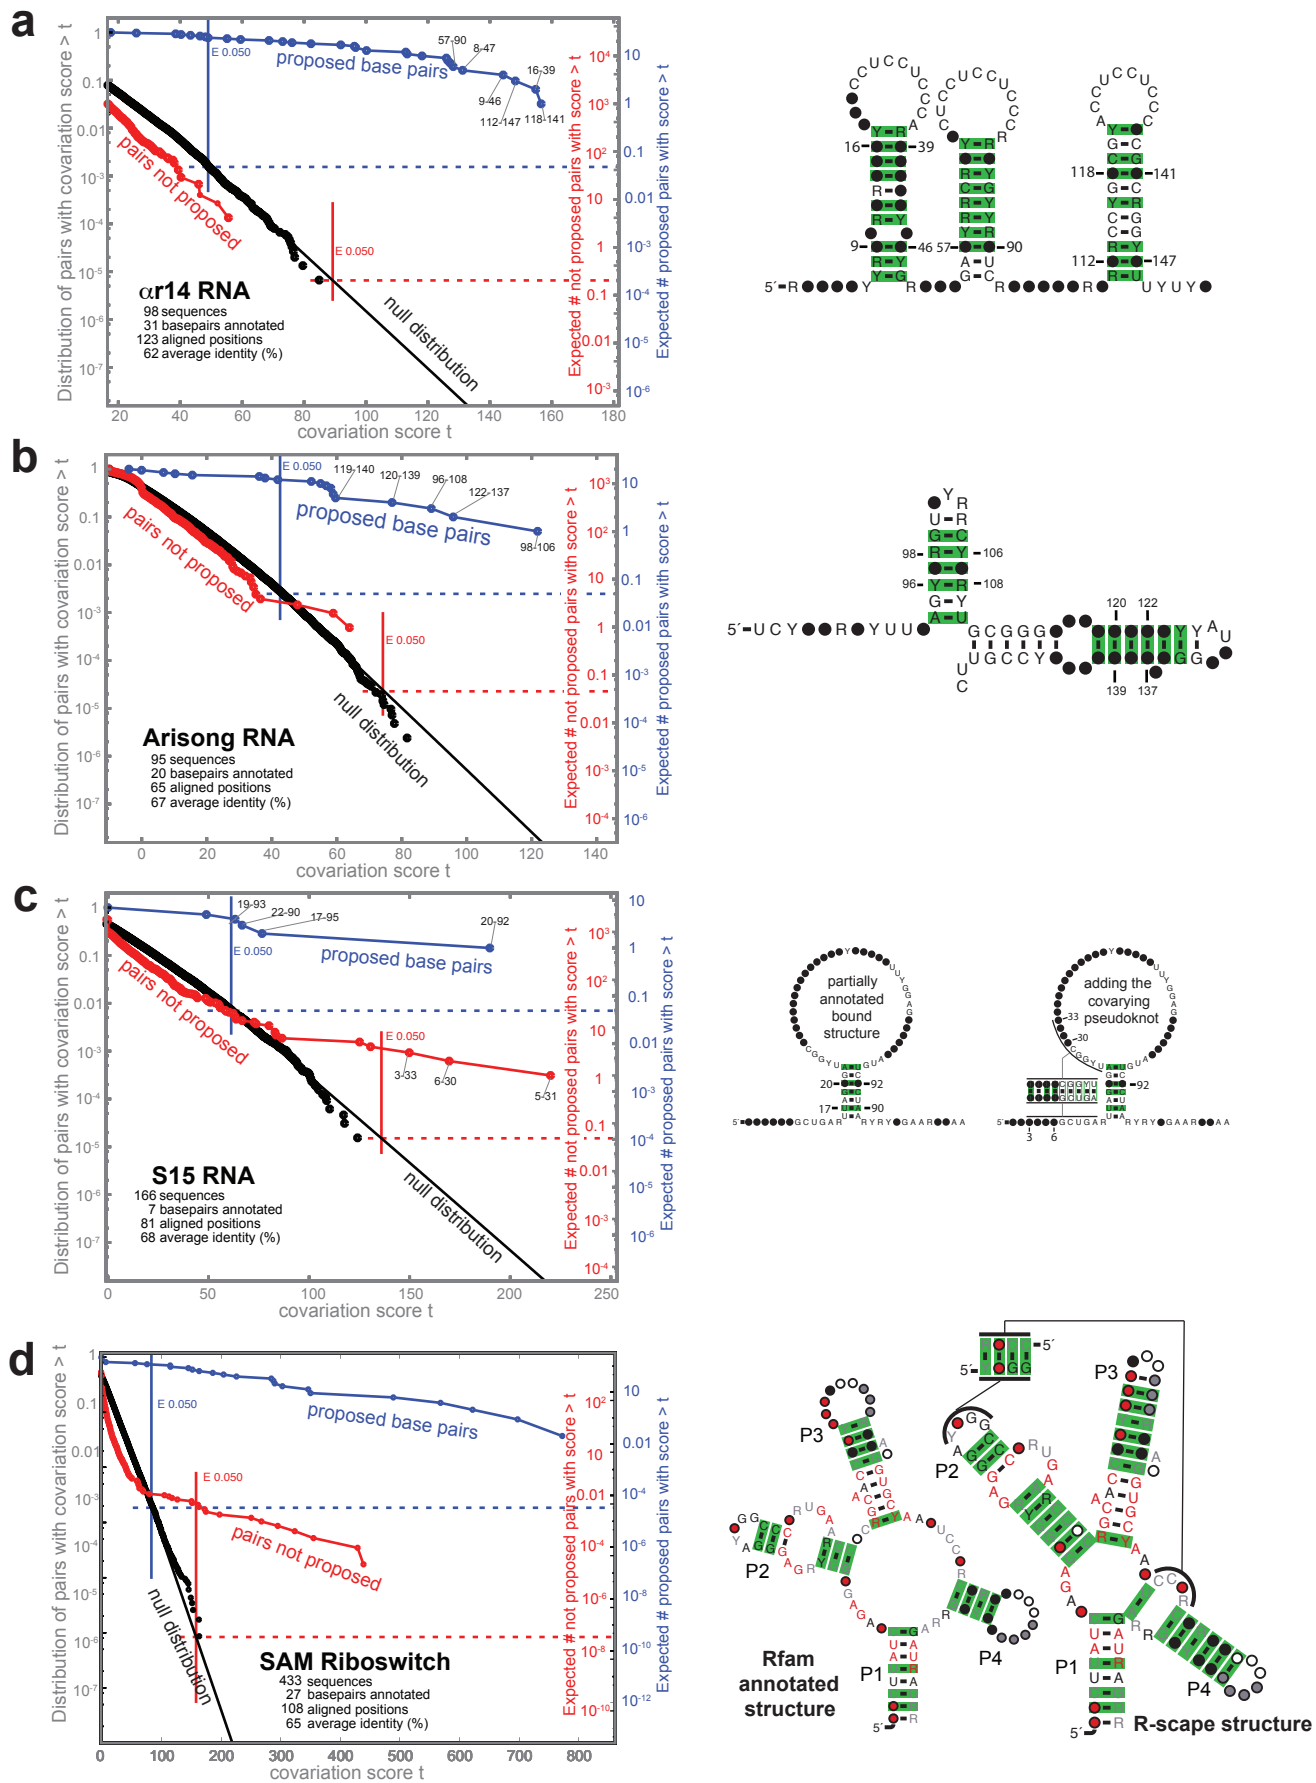

Supplementary Figure 3



**Supplementary Figure 3. Examples of RNAs with significant covariation support for their proposed structures.**

(a) R-scape analysis of a multiple sequence alignment of  $\alpha\tau14$ , a putative regulatory small RNA in  $\alpha$ -proteobacteria [20,42]. (b) R-scape analysis of a multiple sequence alignment of Arisong RNA, a noncoding RNA identified in the ciliate *Oxytricha* [41]. (c) Example of detecting an underannotated structure, an S15 mRNA leader in  $\gamma$ -proteobacteria that autoregulates ribosomal protein synthesis [19]. Three out of the seven significantly covarying pairs are not in the proposed structure. These covarying pairs support the existence of a conserved pseudoknot, which was already known, but happened to not be annotated in the provided alignment [19]. (d) Example of using R-scape to improve a structural annotation for the Rfam seed alignment for SAM-I riboswitch. The R-scape modified structure has seven significant pairs not included in the Rfam-annotated SAM-I structure. The R-scape structure is in agreement with the secondary structure derived from the SAM-I riboswitch crystal structure (RK Montange & RT Batey, *Nature* **441**, 1172-1175, 2006). Notation is as in Figure 2.

## HOTAIR putative Helix 7

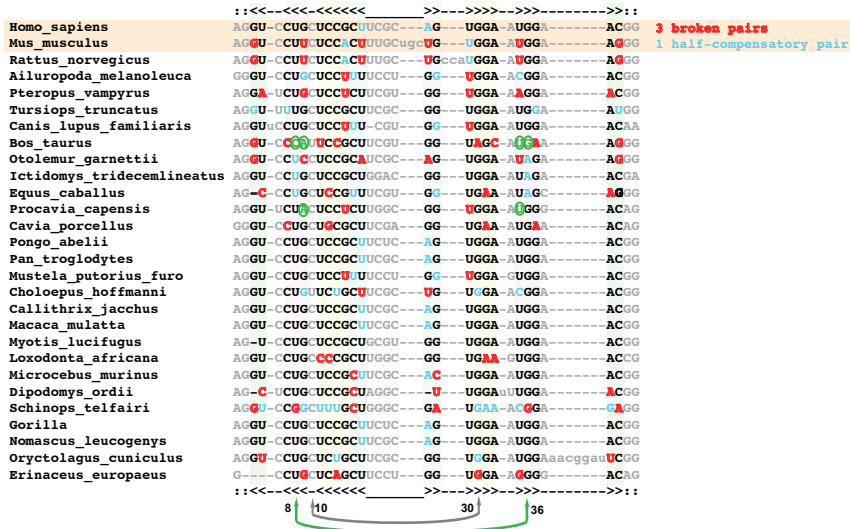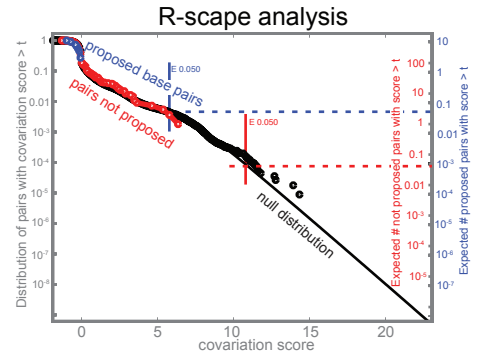

all 28 sequences, all 22 paired columns:  
**36 broken pairs (not A:U,C:G,G:U)**  
**28 apparent half-compensatory pairs**  
**3 apparent compensatory pairs**

## HOTAIR putative Helix 10

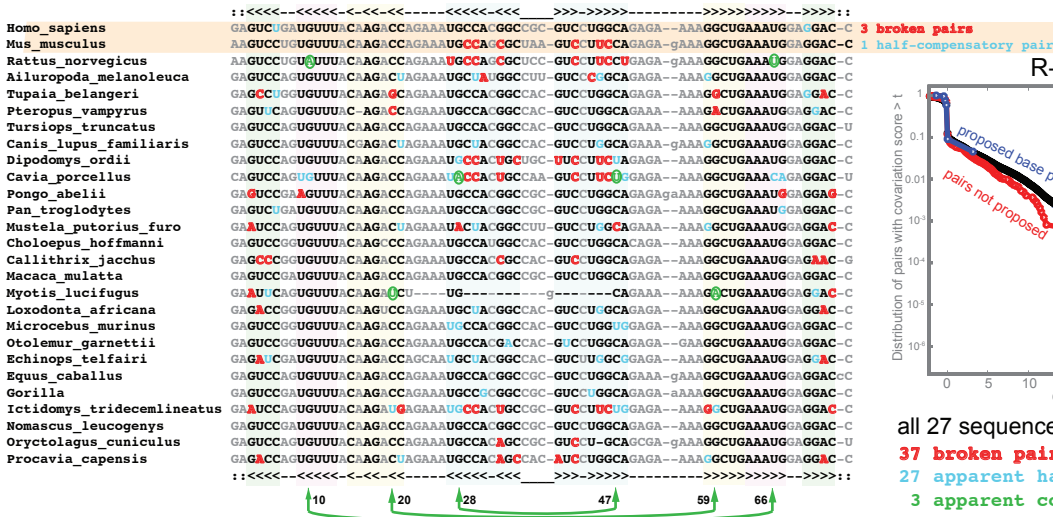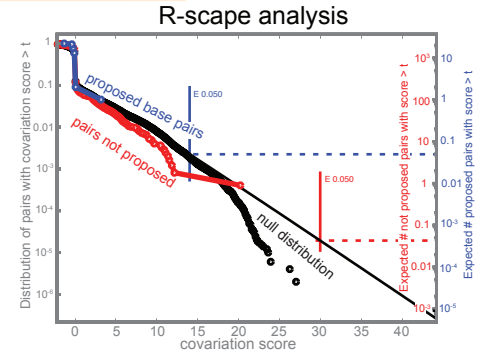

all 27 sequences, all 44 paired columns:  
**37 broken pairs (not A:U,C:G,G:U)**  
**27 apparent half-compensatory pairs**  
**3 apparent compensatory pairs**

**Supplementary Figure 4. Covariation analysis of HOTAIR putative helices H7 and H10.** The structural alignments have been extracted from the HOTAIR Domain 1 alignment (with 37 sequences) provided in [13]. The H7 and H10 alignments have 28 and 27 sequences respectively, after removing species for which the region does not include any residues. For any two base paired positions, changes are annotated in color relative to the most frequent Watson-Crick or G:U pair. Green arrows indicate the base pairs (one for H7 and 3 for H10) proposed as covarying in [13]. For putative helix H7, the proposed covarying pair (columns 8:36 marked in green) has covariation score -0.16 (E-value 7.74). Gray arrows indicate the best scoring putative Watson-Crick pair (columns 10:30, with a consensus C:G) which was not part of the proposed structure. This best scoring alternative pair would have one U:A compensatory and one U:G half-compensatory changes, and covariation score 3.66 (E-value 5.52). For both alignments, the R-scape analysis is shown to the right. For putative helix H10, the one covariation above the null hypothesis corresponds to a G:G/U:C non-Watson-Crick covariation in a pair of adjacent columns that are not in the proposed structure and are too close to be a base pair.

## ncsRA putative helices H3 and H4

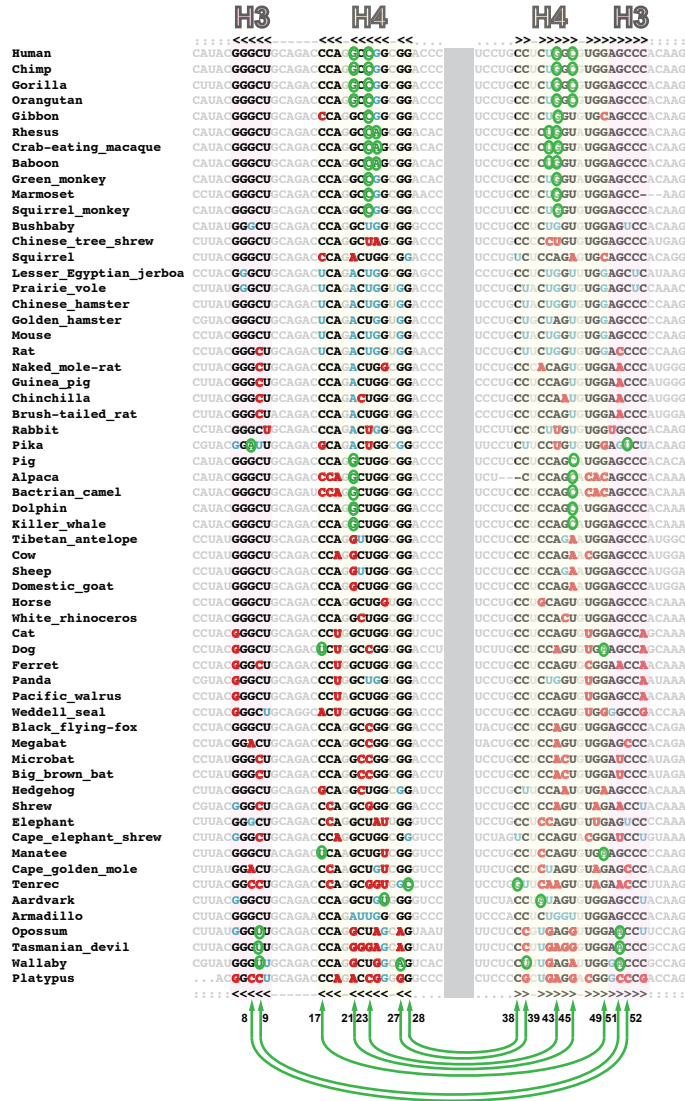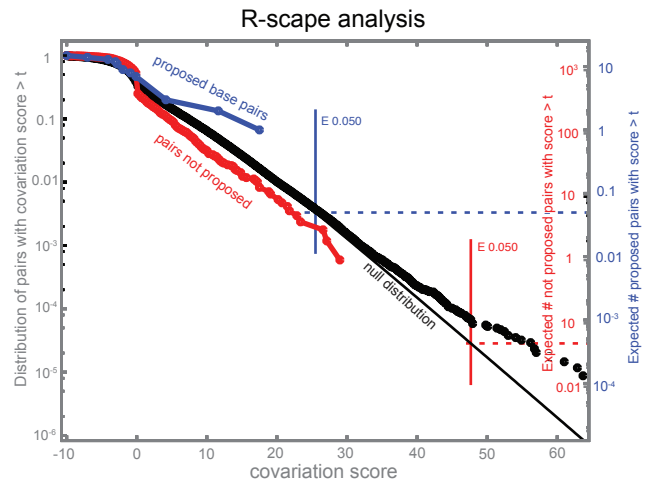

all 60 sequences, all 30 paired columns:  
**91 broken pairs (not A:U,C:G,G:U)**  
**77 apparent half-compensatory pairs**  
**32 apparent compensatory pairs**

Supplementary Figure 5. Covariation analysis of putative helices H3 and H4 of ncsRA. Color annotation as in Supplementary Figure 4. Green arrows indicate the seven base pairs identified in [21] as significantly covarying. At right, the R-scape analysis for all pairs in this partial ncsRA alignment.

# ncSRA putative helices H19-H21

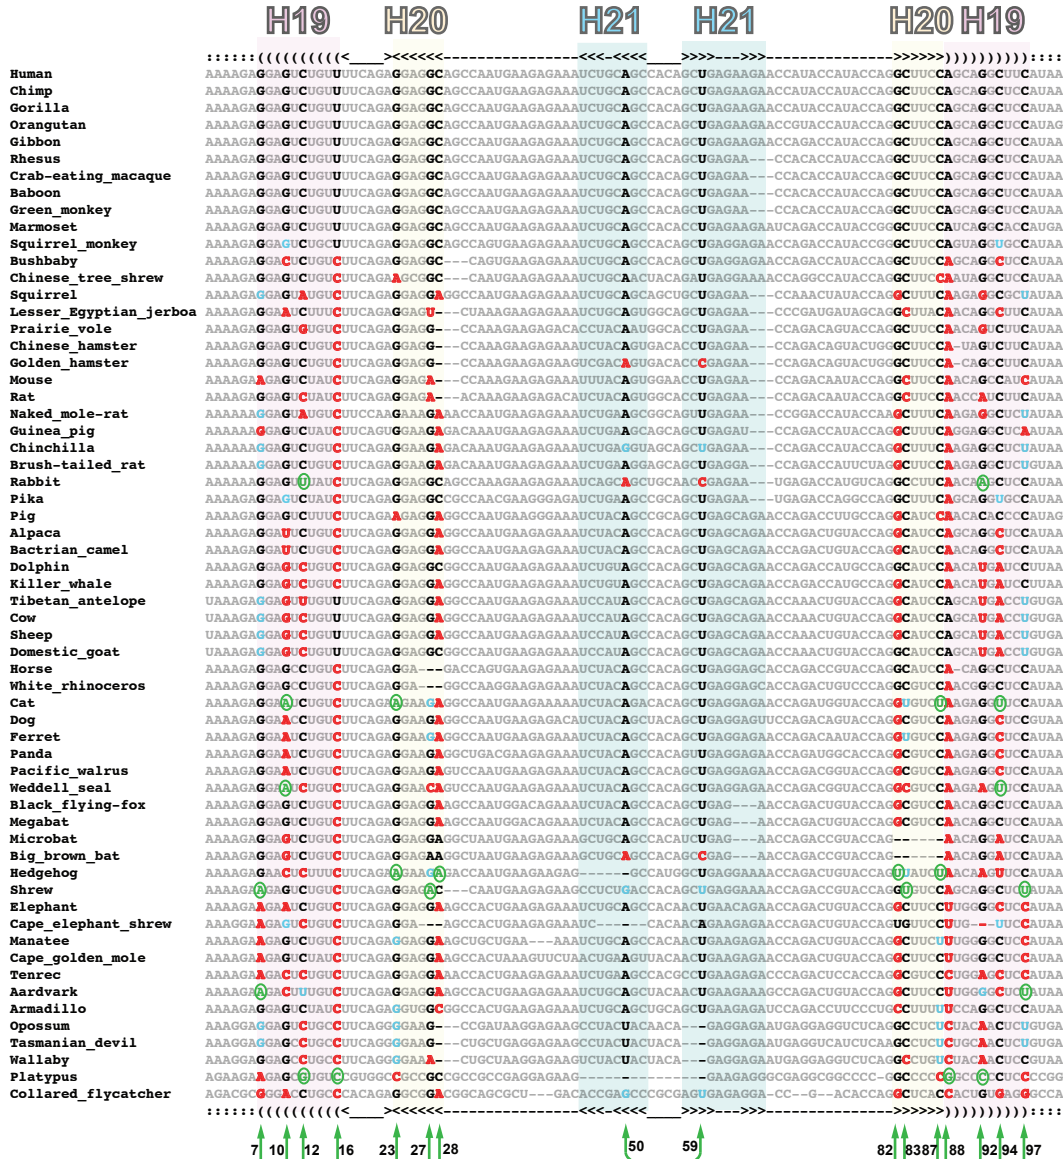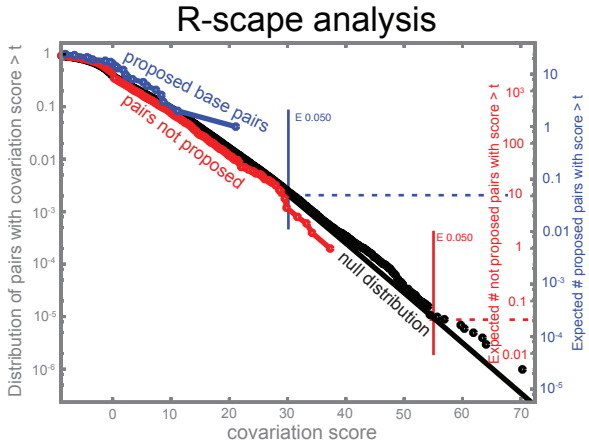

all 74 sequences, all 48 paired columns:  
**279 broken pairs (not A:U, C:G, G:U)**  
**87 apparent half-compensatory pairs**  
**19 apparent compensatory pairs**

Supplementary Figure 6

**Supplementary Figure 6. Covariation analysis of putative helices H19, H20, and H21 of ncSRA.** Color annotation as in Supplementary Figure 4. Green arrows indicate eight base pairs identified in [21] as significantly covarying. The R-scape analysis for all pairs in this partial ncSRA alignment is shown below.

# Xist Repeat A region

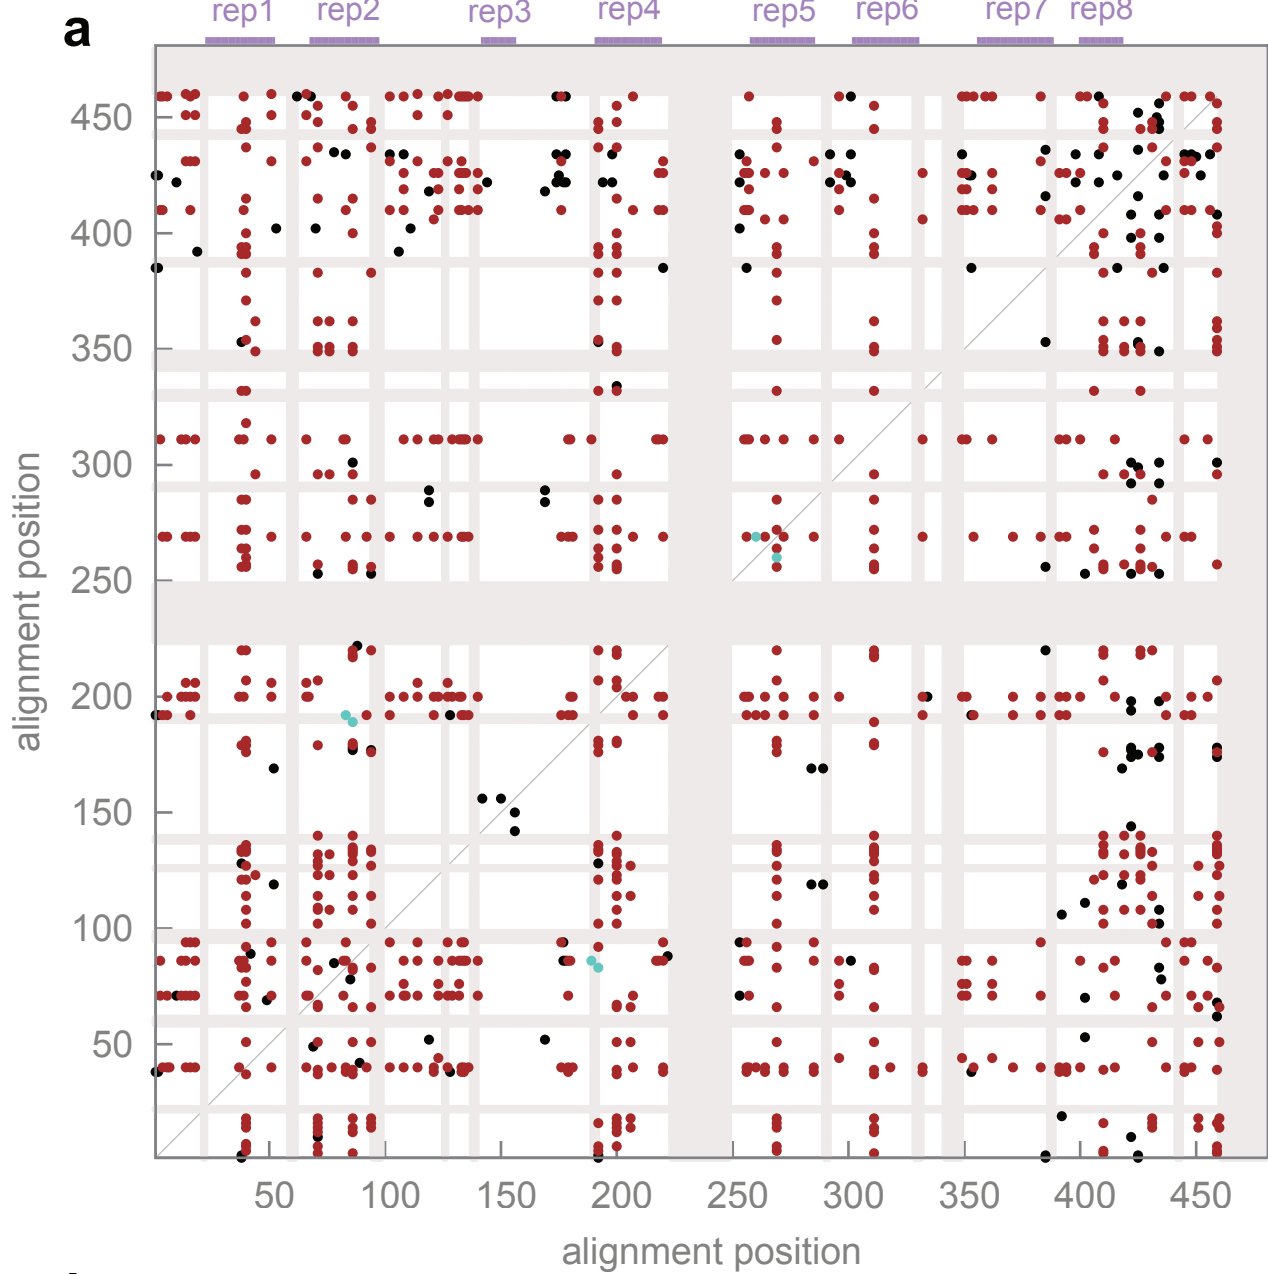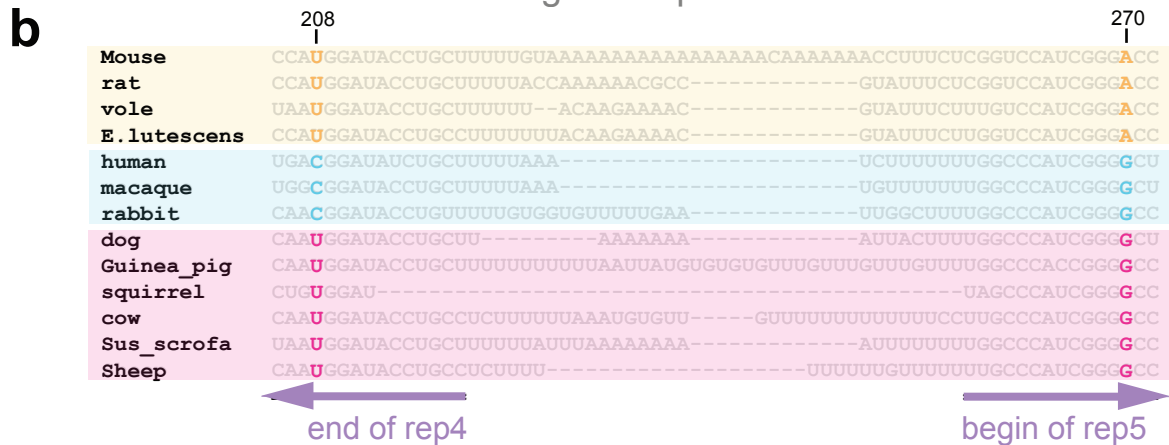

**Supplementary Figure 7. Apparent covariations in 13 aligned Xist RepA region sequences [23].** (a) An alignment column pair was counted as covarying in [23] if it is entirely consistent with Watson-Crick or G:U base pairing, and at least one substitution and no more than two gaps are observed in each column. The dot plot shows 541 column pairs that satisfy these criteria in the RepA alignment used in [23], including (in blue) three of the four cited as support for the secondary structure in [23] (the other has a A:A noncanonical pair, thus does not strictly satisfy the rule), 454 pairs that consist of a U+C column and a G+A column (red), and 84 other pairs (black). (b) Example of how single substitutions in conserved U+C and G+A columns can create apparent covariation.

| RNA                                      | source                         | total bpairs<br>in structure | number of<br>sequences | average<br>identity (%) | alignment<br>length |
|------------------------------------------|--------------------------------|------------------------------|------------------------|-------------------------|---------------------|
| HOTAIR Domain1                           | [13] (provided by authors)     | 149                          | 37                     | 74 (71)                 | 526 (792)           |
| HOTAIR Domain2                           | [13] (provided by authors)     | 143                          | 31                     | 74 (73)                 | 515 (794)           |
| HOTAIR Domain3                           | [13] (provided by authors)     | 125                          | 34                     | 68 (68)                 | 468 (571)           |
| HOTAIR Domain4                           | [13] (provided by authors)     | 165                          | 31                     | 69 (68)                 | 637 (884)           |
| SRA ncRNA                                | similar to [21]                | 234                          | 76                     | 78 (77)                 | 887 (1181)          |
| XIST RepA Structure0                     | derived from [22]              | 50 (53)                      | 10                     | 82 (77)                 | 420 (560)           |
| XIST RepA Structure1                     | derived from [22]              | 74 (90)                      | 10                     | 82 (77)                 | 420 (560)           |
| XIST RepA Structure2                     | derived from [22]              | 69 (72)                      | 10                     | 82 (77)                 | 420 (560)           |
| XIST RepA Structure3                     | derived from [22]              | 79 (83)                      | 10                     | 82 (77)                 | 420 (560)           |
| XIST RepA Targeted Structure-Seq         | derived from [23]              | 88 (99)                      | 13                     | 76 (75)                 | 442 (481)           |
| Arisong RNA                              | [41] (updated from authors)    | 20                           | 95                     | 66 (65)                 | 65 (150)            |
| $\alpha$ r45                             | [20,42] (updated from authors) | 52                           | 31                     | 87 (86)                 | 180 (186)           |
| $\alpha$ r35                             | [20,42] (updated from authors) | 45                           | 5                      | 78                      | 144 (146)           |
| $\alpha$ r15                             | [20,42] (updated from authors) | 29                           | 51                     | 73 (71)                 | 112 (129)           |
| $\alpha$ r14                             | [20,42] (updated from authors) | 31                           | 98                     | 62 (61)                 | 123 (153)           |
| $\alpha$ r9                              | [20,42] (updated from authors) | 40                           | 26                     | 78 (76)                 | 146 (171)           |
| $\alpha$ r7                              | [20,42] (updated from authors) | 35                           | 26                     | 65 (64)                 | 144 (168)           |
| L1RNA                                    | [19]                           | 9 (15)                       | 703                    | 57 (54)                 | 31 (72)             |
| L10RNA                                   | [19]                           | 16 (59)                      | 805                    | 49 (46)                 | 78 (319)            |
| L20RNA                                   | [19]                           | 34                           | 150                    | 65 (63)                 | 87 (127)            |
| L4RNA                                    | [19]                           | 59                           | 172                    | 61 (58)                 | 197 (328)           |
| S15RNA                                   | [19]                           | 7                            | 166                    | 68 (67)                 | 81 (109)            |
| S1RNA                                    | [19]                           | 24                           | 197                    | 61 (60)                 | 117 (179)           |
| S2RNA                                    | [19]                           | 17 (45)                      | 614                    | 47 (43)                 | 96 (279)            |
| S4RNA                                    | [19]                           | 10                           | 178                    | 74 (73)                 | 110 (129)           |
| S7RNA                                    | [19]                           | 33 (34)                      | 158                    | 812 (79)                | 104 (179)           |
| S8RNA                                    | [19]                           | 30                           | 167                    | 82                      | 105 (108)           |
| tRNA                                     | RF00005 [15]                   | 21                           | 954                    | 45 (44)                 | 71 (118)            |
| RNase P RNA Bacterial                    | RF00010 [15]                   | 102                          | 458                    | 60 (58)                 | 367 (996)           |
| Purine Riboswitch                        | RF00167 [15]                   | 22                           | 133                    | 55                      | 102 (113)           |
| SAM-I Riboswitch                         | RF00162 [15]                   | 27                           | 433                    | 64 (63)                 | 108 (231)           |
| hAT-Charlie DNA transposon               | DF0000021 [43]                 | 0                            | 2,000                  | 28 (38)                 | 181 (16,796)        |
| Alu-related SINE/putative ncRNA          | DF0000073 [43]                 | 0                            | 456                    | 84 (83)                 | 133 (403)           |
| Long Terminal Repeat of retrovirus HERV1 | DF0000167 [43]                 | 0                            | 13                     | 85 (84)                 | 520 (562)           |

**Supplementary Figure 8. Properties of the structural alignments used in this study.** The alignments we analyzed are derived from the original alignments such that columns with less than 50% occupied positions are not considered. Information for the original alignments is given in parentheses if different from the analyzed alignment. Alignments are available as Stockholm files in the online Supplementary Information.
